# Supplementary material for: Comprehensive Analysis of Metabolites in Brews Prepared from Naturally and Technologically Treated Coffee Beans
Source: MDPI journal article supplement (doi:10.3390/antiox12010095), 2022-12-30
Supplement: s1 [file s1]

# **Comprehensive Analysis of Metabolites in Brews Prepared from Naturally and Technologically Treated Coffee Beans**

Magdalena Jeszka-Skowron, Robert Frankowski , Agnieszka Zgoła-Grze'skowiak and Julia  
Płatkiewicz

## **Supplementary Figures**

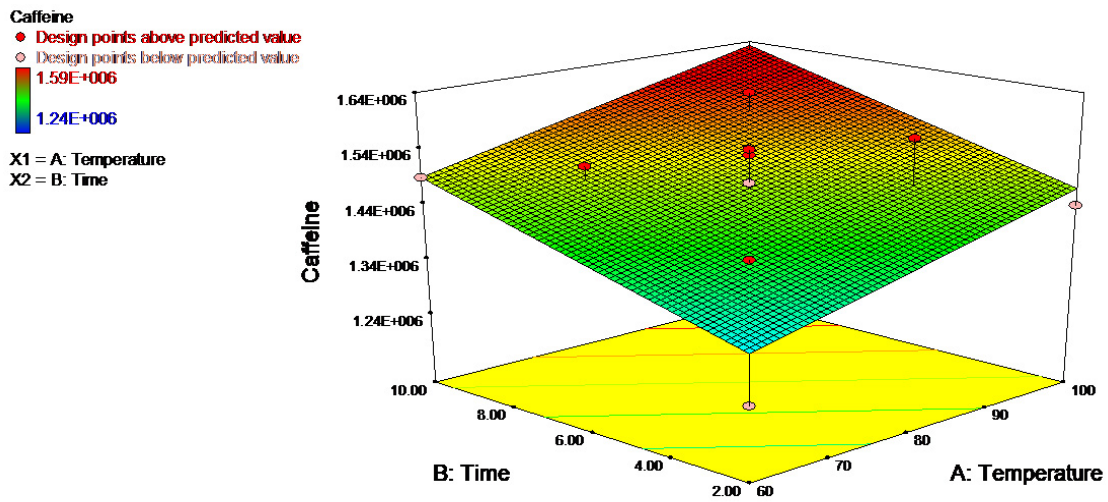

Supplementary Figure S1. Model graph of caffeine for Arabica Mogiana medium roasted coffee brew

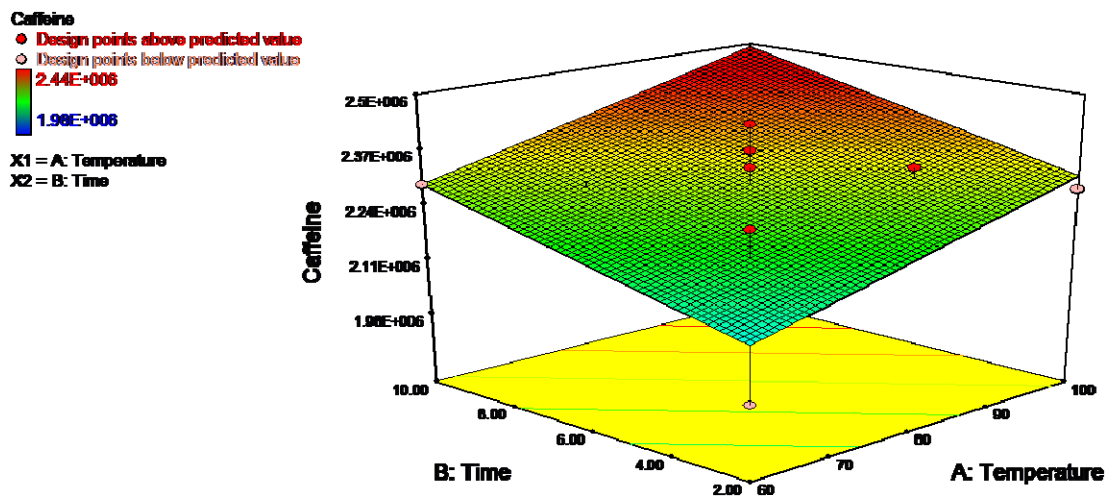

Supplementary Figure S2. Model graph of caffeine for Robusta Vietnam green coffee brew

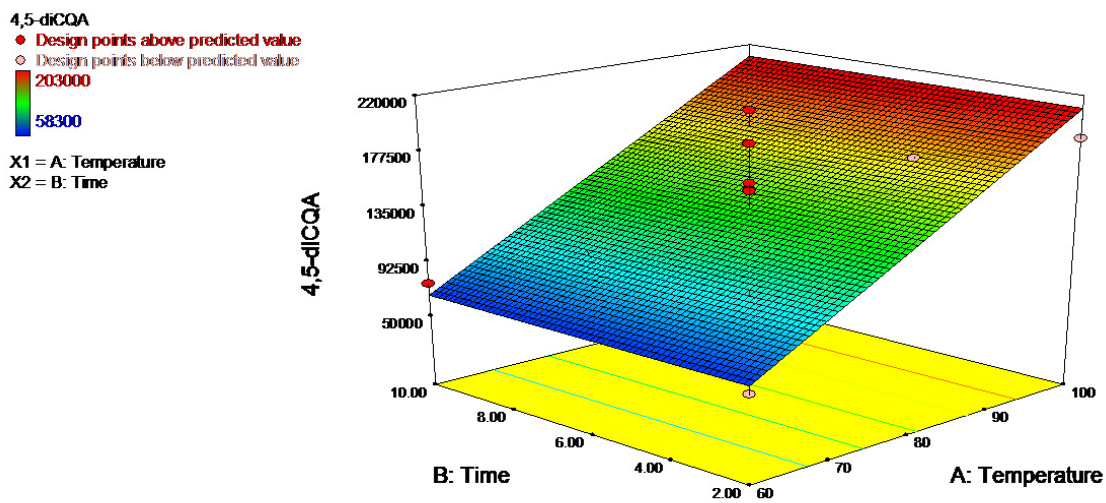

Supplementary Figure S3. Model graph of 4,5-diCQA for Robusta Vietnam green coffee brew

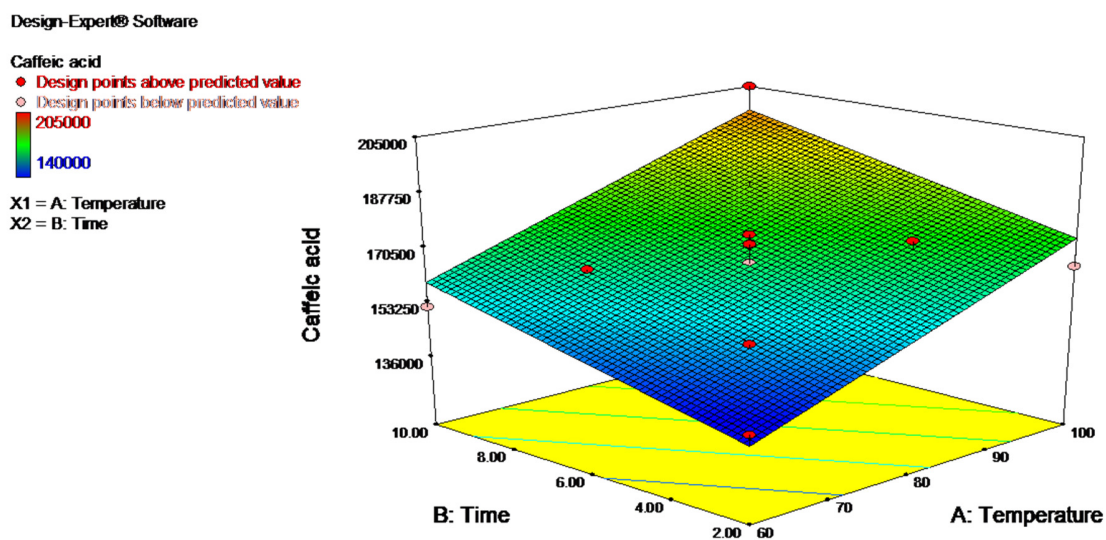

Supplementary Figure S4. Model graph of caffeine for Robusta Vietnam medium roasted coffee brew

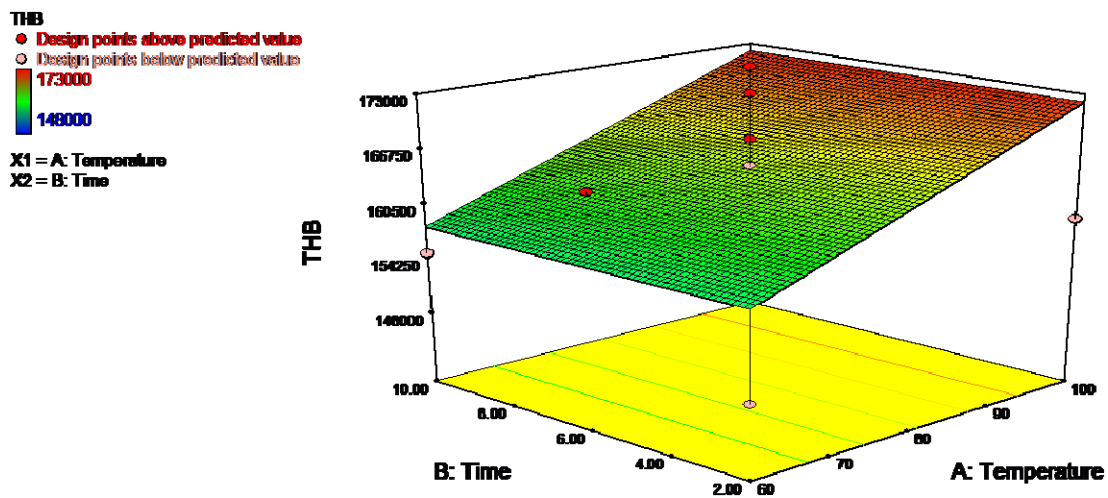

Supplementary Figure S5. Model graph of theobromine (THB) for Robusta Vietnam medium roasted coffee brew
